# Supplementary material for: A human-specific motif facilitates CARD8 inflammasome activation after HIV-1 infection
Source: eLife journal article supplement (doi:10.7554/elife.84108), 2023-07-07
Supplement: data2 [file elife-84108-data2-v2.pdf]

Figure 1C

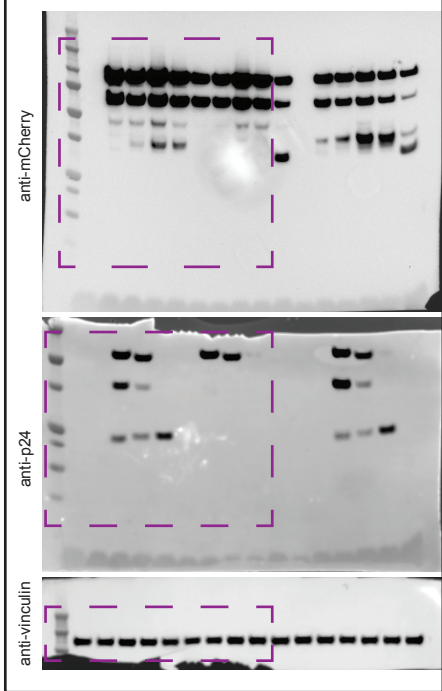

Figure 1D

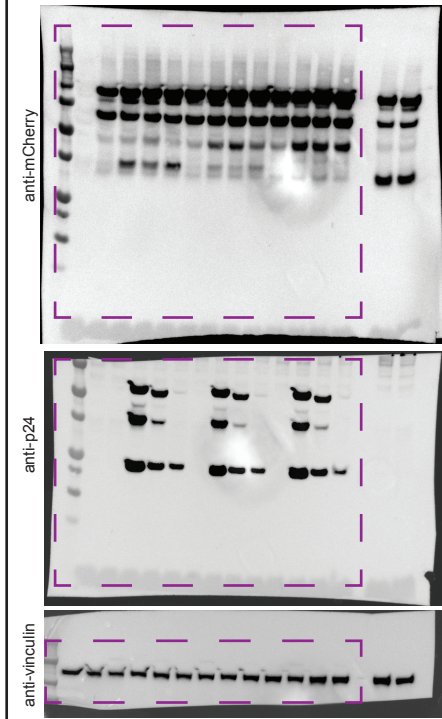

Figure 2A

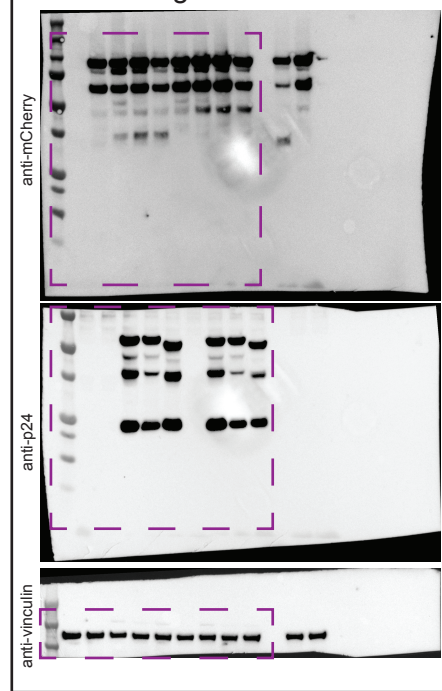

Figure 2B

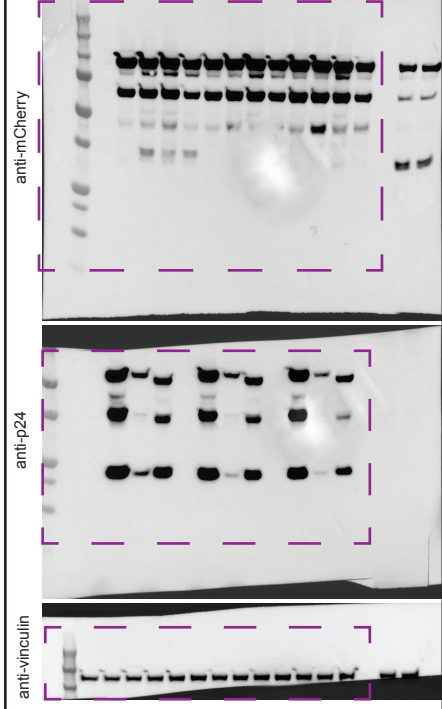

Figure 3A

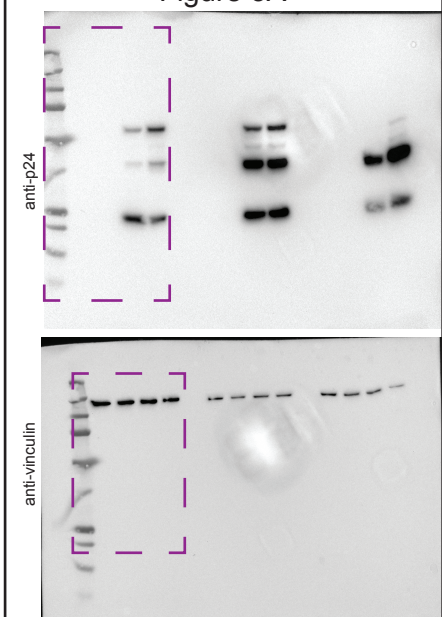

Figure 5A

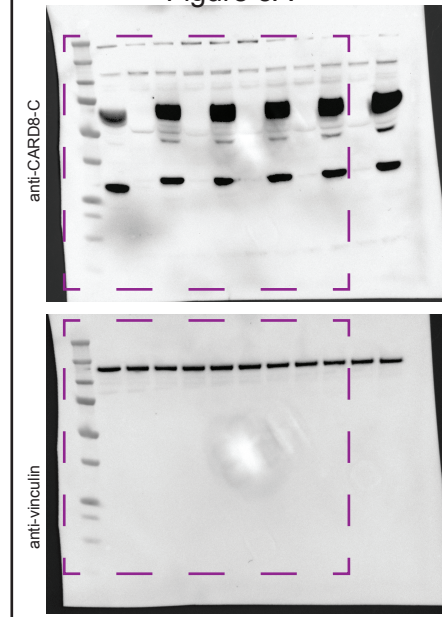

Figure 5D

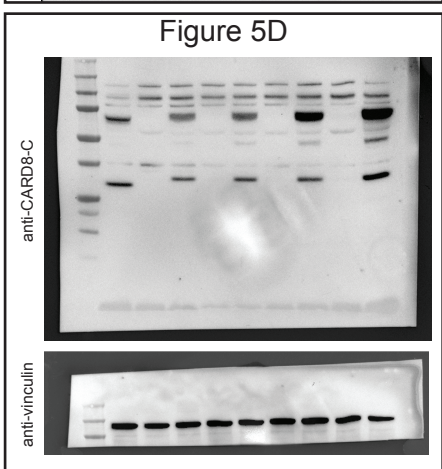

**Main Figure Uncropped Western Blots:**  
 Multichannel images shown are a merge of chemiluminescent and colorimetric images. Dashed purple box indicates lanes used for main figure
